# Supplementary material for: Analytical Techniques Applied to the Study of Industrial Archaeology Heritage: The Case of Plaiko Zubixe Footbridge
Source: MDPI journal article supplement (doi:10.3390/molecules27113609), 2022-06-04
Supplement: s1 [file s1]

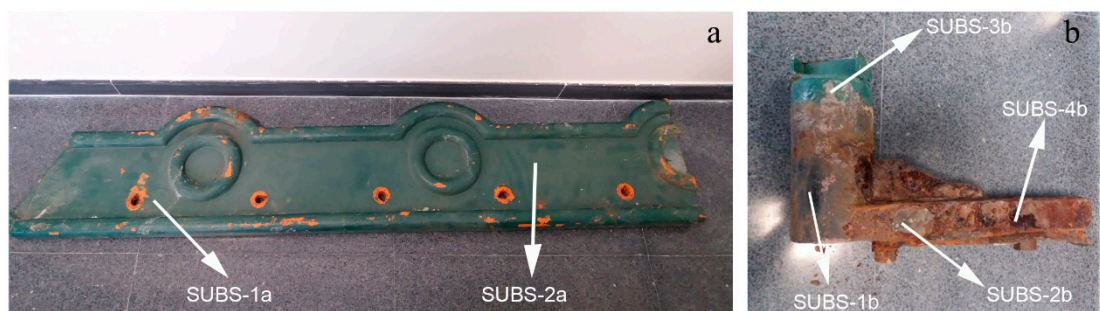

**Figure S1.** Parts of the rotating bridge from which the samples analysed were extracted.

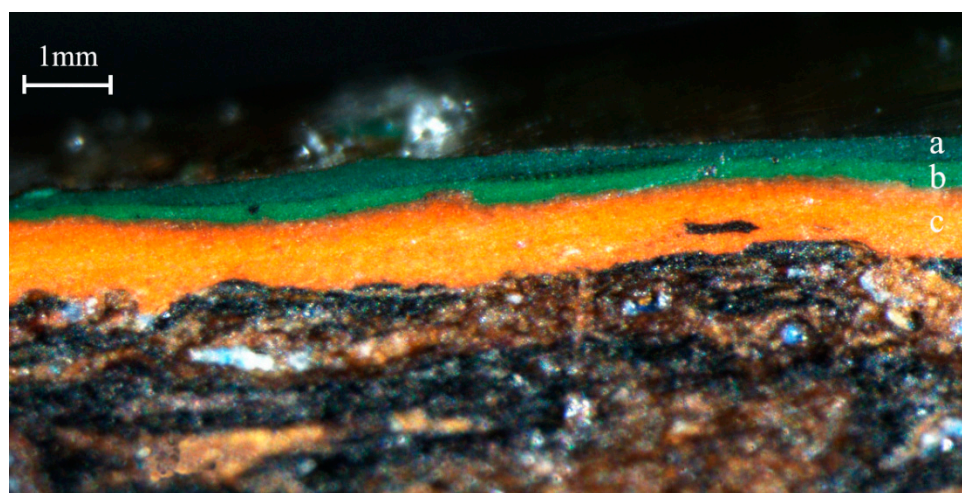

**Figure S2.** Image of the cross-section (sample SUBS-1a) from the piece that belongs to the lower part of the railing showing the three paintings layers and the iron support.

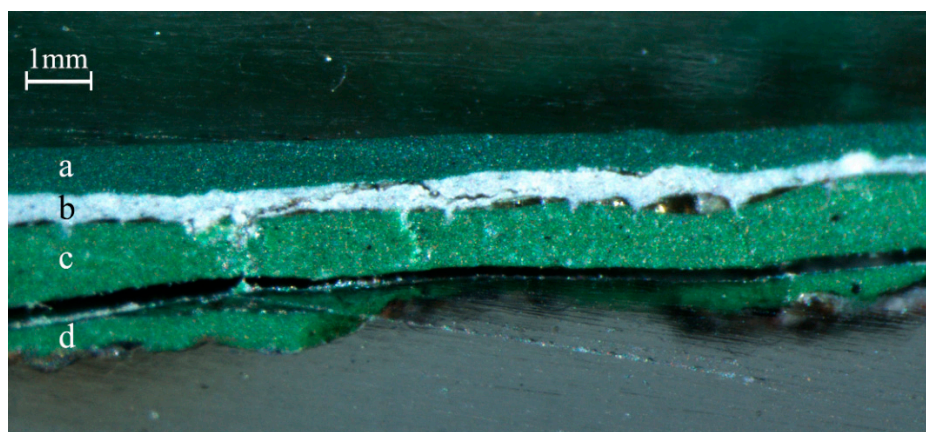

**Figure S3.** Image with a stereoscopic microscope of the sample collected in a green area.

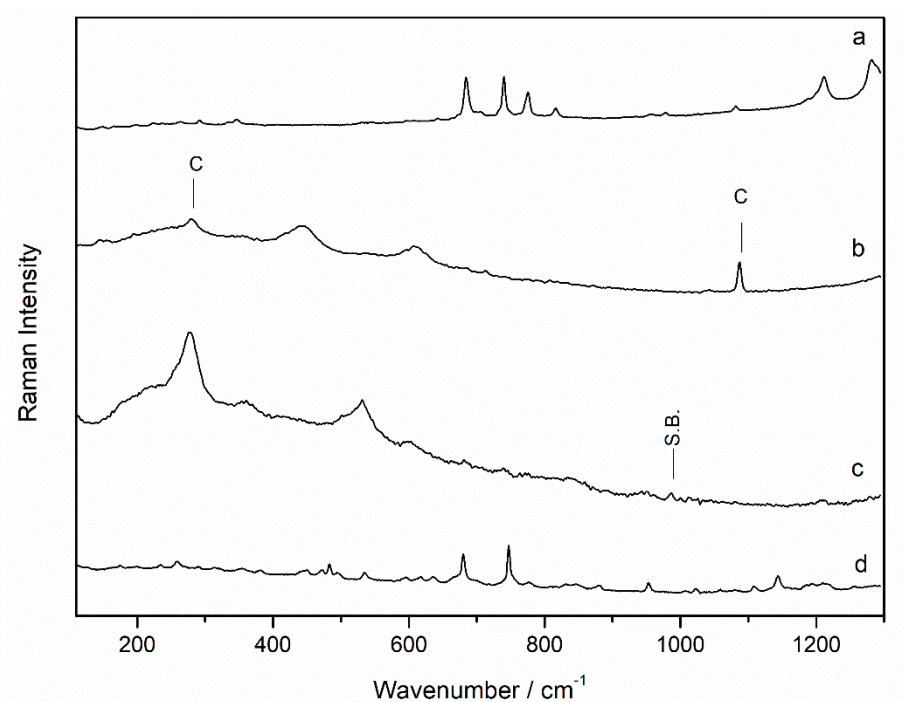

**Figure S4.** Raman spectra of the compounds found in the subsample collected from a green area: phthalocyanine green (a), rutile plus calcium carbonate (C) (b), Prussian blue plus barium sulfate (SB) (c) and phthalocyanine blue (d).

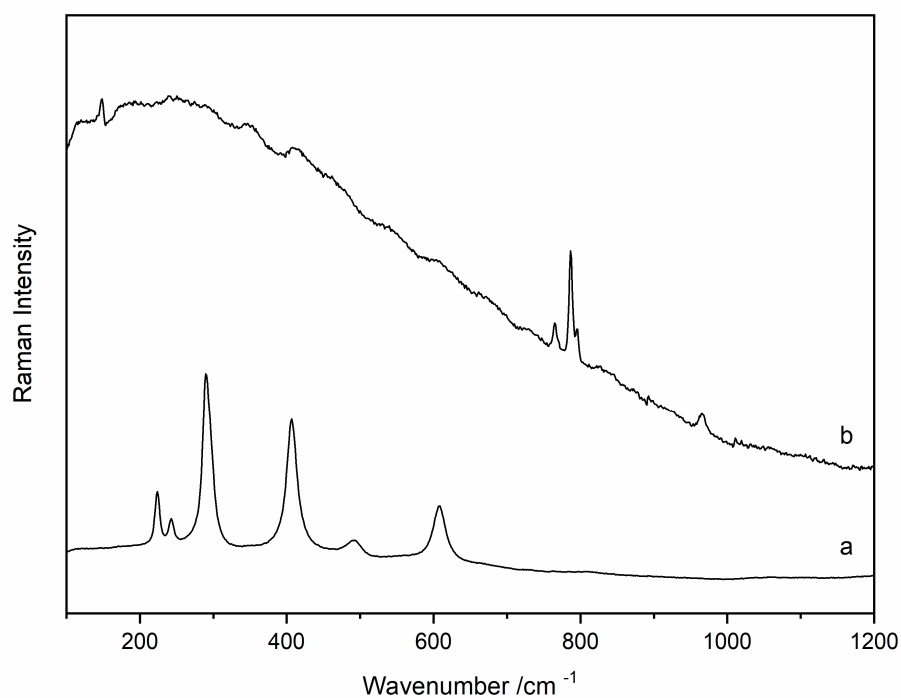

**Figure S5.** Raman spectra of hematite (a) and of the silicon-carbon compound (b).

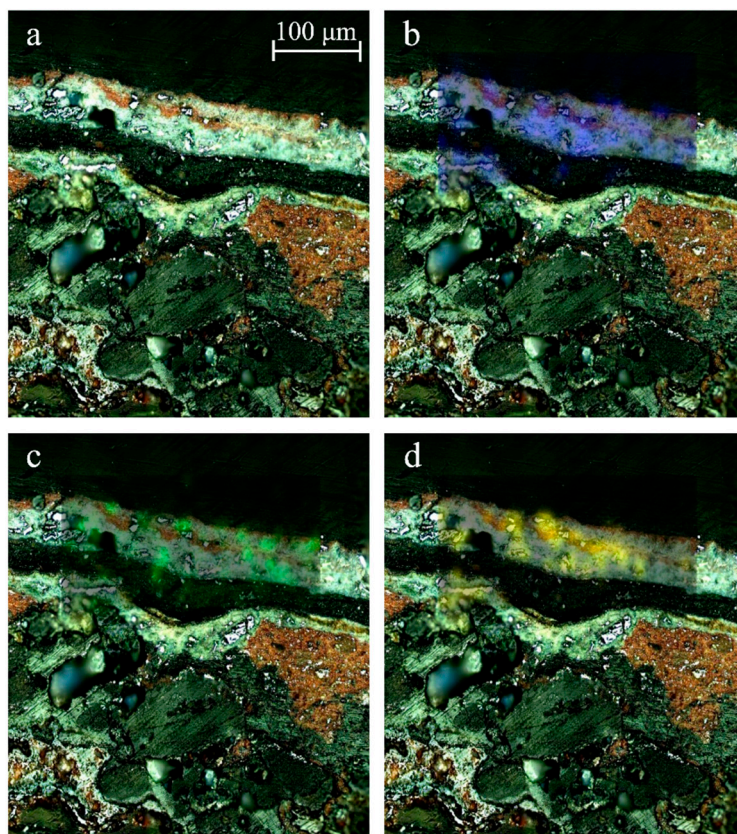

**Figure S6.** Raman images show the distribution of hematite (b), a silicon and carbon material (c) and barium sulfate (d).

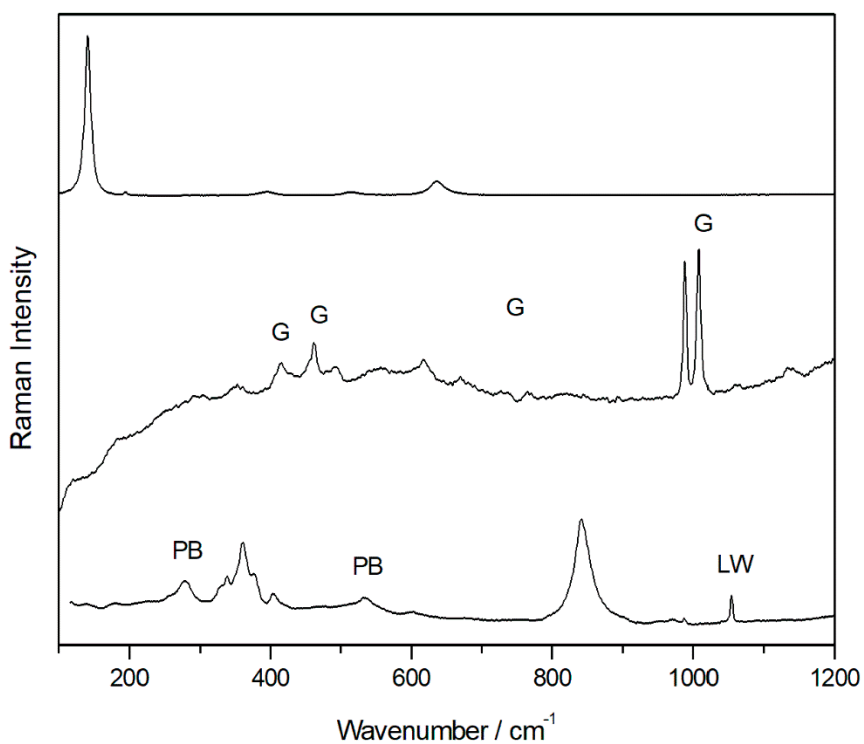

**Figure S7.** Raman spectra of barium lead chromate with Prussian blue (PB) and lead white (LW) sulfate plus gypsum (G) (b) and anatase (c) from the sample SUBS-3b.

**Table S1.** Subsamples collected from each piece of the rotating bridge and techniques employed for their characterization.

|  | Piece             | Subsample 1 | Subsample 2 | Subsample 3     | Subsample 3 |
|--|-------------------|-------------|-------------|-----------------|-------------|
|  | <b>P1a</b>        | SUBS-1a     | SUBS-2a     |                 |             |
|  | <i>Techniques</i> | μ-Raman     | μ-Raman     |                 |             |
|  | <b>P1b</b>        | SUBS-1b     | SUBS-2b     | SUBS-3b         | SUBS-4b     |
|  | <i>Techniques</i> | μ-Raman     | μ-Raman     | μ-Raman μ-EDXRF | μ-Raman,    |
